# Supplementary material
Source: HighWire-hosted journal article supplement (https://bmjopen.bmj.com/content/7/8/e015918)
Supplement: inline-supplementary-material-1 [file inline-supplementary-material-1.pdf]

Appendix 1 - ParticiPate CP Clinical Reasoning Sheet

ID no: Cohort: Date:

| COPM Goal/s | Barrier | Category |     | Strategy | Strategy Category |     | GAS Goal (if applicable) |
|-------------|---------|----------|-----|----------|-------------------|-----|--------------------------|
|             |         | ICF-CY   | TDF |          | ICF-CY            | TDF |                          |
|             |         |          |     |          |                   |     |                          |
|             |         |          |     |          |                   |     |                          |
|             |         |          |     |          |                   |     |                          |
|             |         |          |     |          |                   |     |                          |
|             |         |          |     |          |                   |     |                          |
|             |         |          |     |          |                   |     |                          |

COPM, Canadian Occupational Performance Measure; ICF-CY, International Classification of Functioning, Disability and Health – Child and Youth Version; TDF, Theoretical Domains Framework; GAS, Goal Attainment Scaling
