# Supplementary material
Source: HighWire-hosted journal article supplement (https://bmjopen.bmj.com/content/7/8/e015918)

## Appendix 6 - ParticiPate CP Stages of Behaviour Change Flow Chart

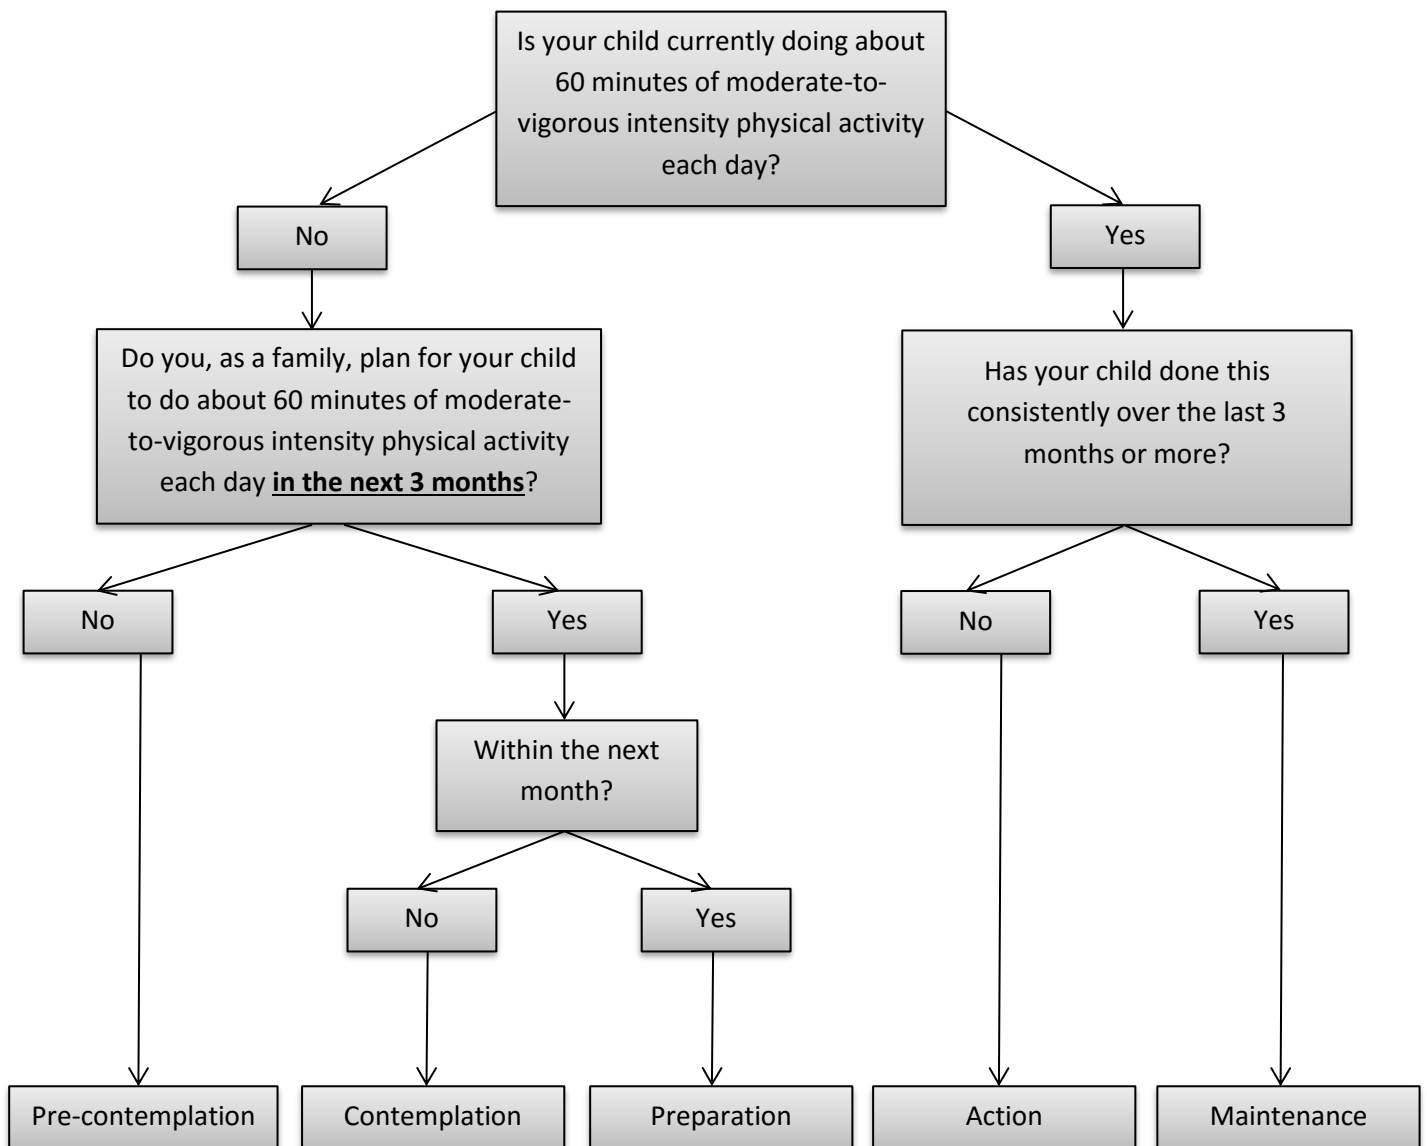

Supplement: inline-supplementary-material-6 [file inline-supplementary-material-6.pdf]
